# Supplementary material
Source: PubMed Central journal article supplement (PMC4610300)
Supplement: ct5007357_si_001.pdf [file ct5007357_si_001.pdf]

# Supplementary Information for “Modeling Molecular Kinetics with tICA and the Kernel Trick”

Christian R. Schwantes<sup>†</sup> and Vijay S. Pande<sup>\*,†,§</sup>

*Department of Chemistry, Stanford University, Stanford, CA 94305*

E-mail: [pande@stanford.edu](mailto:pande@stanford.edu)

---

\*To whom correspondence should be addressed

<sup>†</sup>Department of Chemistry, Stanford University, Stanford, CA 94305

<sup>‡</sup>Department of Computer Science, Stanford University, Stanford, CA 94305

<sup>¶</sup>Department of Structural Biology, Stanford University, Stanford, CA 94305

## Bracket Notation

In the main text, we used

$$\mathbf{x} \cdot \mathbf{y} = \mathbf{x}^T \mathbf{y}$$

to denote the inner product between two column vectors, and

$$\mathbf{x} \otimes \mathbf{y} = \mathbf{xy}^T$$

to denote the outer product. However, in what follows, it is very useful to use bra-ket notation to follow the algebraic steps that arrive at the ktICA solution. Therefore, below:

$$\langle \mathbf{x} | \mathbf{y} \rangle = \mathbf{x} \cdot \mathbf{y} = \mathbf{x}^T \mathbf{y}$$

denotes the inner product, while the outer product is written as:

$$|\mathbf{x}\rangle \langle \mathbf{y}| = \mathbf{x} \otimes \mathbf{y} = \mathbf{xy}^T$$

## Maximum Likelihood Estimator for tICA Matrices

If  $|\mathbf{x}_t\rangle$  is a Markov chain in phase space, then the time-lag correlation,  $C^{(\tau)}$ , and covariance,  $\Sigma$ , matrices are defined as:

$$C^{(\tau)} = \mathbb{E}[|\delta\mathbf{x}_t\rangle \langle \delta\mathbf{x}_{t+\tau}|] \tag{1}$$

$$\Sigma = \mathbb{E}[|\delta\mathbf{x}_t\rangle \langle \delta\mathbf{x}_t|] \tag{2}$$

where  $|\delta\mathbf{x}_t\rangle = |\mathbf{x}_t\rangle - |\mu\rangle$  and  $\mu = \mathbb{E}[|\mathbf{x}_t\rangle]$ .

To use the tICA method, we must construct estimators for  $\mu$ ,  $\Sigma$ , and  $C^{(\tau)}$  given finite samples of the Markov chain. Importantly, the time-lag correlation matrix should be symmetric since the dynamics are reversible, but this may not be the case if only a sample mean

is used. The simplest approach we can take is to use a maximum likelihood estimator, where we assume the data is distributed according to a multivariate normal distribution.

We assume that we are given  $M$  pairs of transitions separated in time by  $\tau$ ,  $\{(|X_t\rangle, |Y_t\rangle)\}_{t=1}^M$ . Define a new variable,  $|Z_t\rangle$ , which is the concatenation of  $|X_t\rangle$  and  $|Y_t\rangle$ :

$$|Z_t\rangle = \begin{bmatrix} |X_t\rangle \\ |Y_t\rangle \end{bmatrix}$$

Then we will assume that these variables are distributed according to a multivariate normal with covariance matrix,  $S$  equal to:

$$S = \begin{bmatrix} \Sigma & C^{(\tau)} \\ C^{(\tau)} & \Sigma \end{bmatrix}$$

and mean given by:

$$|m\rangle = \begin{bmatrix} |\mu\rangle \\ |\mu\rangle \end{bmatrix}$$

Then the probability density at  $|z\rangle$  can be written as:

$$p(|z\rangle | S, \mu) = (2\pi)^{-\frac{d}{2}} |S|^{-\frac{1}{2}} \exp \left[ -\frac{1}{2} \left( \langle z | - \langle m | \right) S^{-1} \left( |z\rangle - |m\rangle \right) \right]$$

where  $d$  is twice the dimension of phase space.

Using this distribution, we can write the log-likelihood of the observed transitions, given the model:

$$\log L = \sum_{t=1}^M \left[ -\frac{d}{2} \log 2\pi - \frac{1}{2} \log |S| - \frac{1}{2} \left( \langle Z_t | - \langle m | \right) S^{-1} \left( |Z_t\rangle - |m\rangle \right) \right] \quad (3)$$

Using the properties of the matrix differential, it can be shown that the total differential of the log-likelihood is:

$$\begin{aligned}
d \log L = & -\frac{M}{2} \operatorname{tr}(S^{-1}dS) \\
& -\frac{1}{2} \sum_{t=1}^M \operatorname{tr} \left[ 2S^{-1} \left( |Z_t\rangle - |m\rangle \right) d\langle m| \right] \\
& -\frac{1}{2} \sum_{t=1}^M \operatorname{tr} \left[ S^{-1} \left( |Z_t\rangle - |m\rangle \right) \left( \langle Z_t| - \langle m| \right) S^{-1} dS \right]
\end{aligned} \tag{4}$$

We could rewrite this total differential in terms of  $|\mu\rangle$ ,  $C^{(\tau)}$ , and  $\Sigma$ , but it's more convenient to use the method of Lagrange multipliers to constrain the solutions,  $S$  and  $|m\rangle$ . Let  $R$  be a block rotation matrix:

$$R = \begin{bmatrix} 0 & I \\ I & 0 \end{bmatrix}$$

It's easy to show that:

$$R \begin{bmatrix} A & B \\ C & D \end{bmatrix} R = \begin{bmatrix} D & C \\ B & A \end{bmatrix}$$

and

$$R \begin{bmatrix} A \\ B \end{bmatrix} = \begin{bmatrix} B \\ A \end{bmatrix},$$

therefore the constraints we need to impose are:

$$RSR = S \quad \text{and} \quad R|m\rangle = |m\rangle.$$

We can then construct the Lagrange function:

$$\Lambda = \log L + \langle \lambda | \left( R|m\rangle - |m\rangle \right) + \sum_i \sum_j \phi_{ij} [RSR - S]_{ij}$$

The total differential of  $\Lambda$  can then be written:

$$\begin{aligned}
d\Lambda = & \text{tr} \left[ \left( - \sum_{t=1}^M S^{-1} (|Z_t\rangle - |m\rangle) + (R - I) |\lambda\rangle \right) d\langle m| \right] \\
& + \text{tr} \left[ \left( -\frac{M}{2} S^{-1} - \frac{1}{2} \sum_{t=1}^M S^{-1} (|Z_t\rangle - |m\rangle) \right) \left( \langle Z_t| - \langle m| \right) S^{-1} + (R\Phi R - \Phi) \right) dS \right] \\
& + \text{tr} \left[ (R|m\rangle - |m\rangle) d\langle \lambda| \right] + \text{tr} \left[ (RSR - S) d\Phi \right]
\end{aligned} \tag{5}$$

The total differential is zero exactly when the terms multiplying  $dS$  and  $d|m\rangle$  are zero. First, we solve for  $|m\rangle$ :

$$\begin{aligned}
- \sum_{t=1}^M S^{-1} (|Z_t\rangle - |m\rangle) + (R - I) |\lambda\rangle &= 0 \\
\left( \sum_{t=1}^M |Z_t\rangle \right) - M|m\rangle &= S(R - I) |\lambda\rangle
\end{aligned}$$

Now, we add this equation to itself, but multiplied (from the left) by  $R$ :

$$\begin{aligned}
\left[ \left( \sum_{t=1}^M |Z_t\rangle \right) - M|m\rangle \right] + R \left[ \left( \sum_{t=1}^M |Z_t\rangle \right) - M|m\rangle \right] &= \left[ S(R - I) |\lambda\rangle \right] + R \left[ S(R - I) |\lambda\rangle \right] \\
\left( \sum_{t=1}^M |Z_t\rangle + R|Z_t\rangle \right) - 2M|m\rangle &= (SR - S + RSR - RS) |\lambda\rangle \\
\left( \sum_{t=1}^M |Z_t\rangle + R|Z_t\rangle \right) - 2M|m\rangle &= \left[ (SR - RS) + (RSR - S) \right] |\lambda\rangle \\
\left( \sum_{t=1}^M |Z_t\rangle + R|Z_t\rangle \right) - 2M|m\rangle &= 0 \\
|m\rangle &= \frac{1}{2M} \sum_{t=1}^M |Z_t\rangle + R|Z_t\rangle
\end{aligned}$$

We can then solve for  $S$ .

$$-\frac{M}{2}S^{-1} - \frac{1}{2}\sum_{t=1}^M S^{-1}|\delta Z_t\rangle\langle\delta Z_t|S^{-1} + (R\Phi R - \Phi) = 0$$

$$\frac{M}{2}S + \frac{1}{2}\sum_{t=1}^M |\delta Z_t\rangle\langle\delta Z_t| = S(R\Phi R - \Phi)S$$

Now, add this equation to itself, but multiplied by  $R$  from the left and the right.

$$\begin{aligned} \frac{M}{2}S + \frac{1}{2}\sum_{t=1}^M |\delta Z_t\rangle\langle\delta Z_t| + R\left(\frac{M}{2}S + \sum_{t=1}^M |\delta Z_t\rangle\langle\delta Z_t|\right)R \\ &= S(R\Phi R - \Phi)S + R\left(S(R\Phi R - \Phi)S\right)R \\ MS + \left(\frac{1}{2}\sum_{t=1}^M |\delta Z_t\rangle\langle\delta Z_t| + R|\delta Z_t\rangle\langle\delta Z_t|R\right) \\ &= SR\Phi RS - S\Phi S + RSR\Phi RSR - RS\Phi SR \\ MS + \left(\frac{1}{2}\sum_{t=1}^M |\delta Z_t\rangle\langle\delta Z_t| + R|\delta Z_t\rangle\langle\delta Z_t|R\right) \\ &= (SR\Phi RS - RS\Phi SR) + (RSR\Phi RSR - S\Phi S) \\ MS + \left(\frac{1}{2}\sum_{t=1}^M |\delta Z_t\rangle\langle\delta Z_t| + R|\delta Z_t\rangle\langle\delta Z_t|R\right) \\ &= 0 \\ S &= \frac{1}{2M}\sum_{t=1}^M \left(|\delta Z_t\rangle\langle\delta Z_t| + R|\delta Z_t\rangle\langle\delta Z_t|R\right) \end{aligned}$$

These solutions mean that the maximum likelihood estimators for  $|\mu\rangle$ ,  $\Sigma$ , and  $C^{(\tau)}$  are:

$$|\mu_{\text{mle}}\rangle = \frac{1}{2N}\sum_{t=1}^N \left(|\delta X_t\rangle + |\delta Y_t\rangle\right) \quad (6)$$

$$\Sigma_{\text{mle}} = \frac{1}{2N}\sum_{t=1}^N \left(|\delta X_t\rangle\langle\delta X_t| + |\delta Y_t\rangle\langle\delta Y_t|\right) \quad (7)$$

$$C_{\text{mle}}^{(\tau)} = \frac{1}{2N} \sum_{t=1}^N \left( |\delta X_t\rangle \langle \delta Y_t| + |\delta Y_t\rangle \langle \delta X_t| \right) \quad (8)$$

Although, the MVN assumption is very crude, these estimators have two desirable properties:

1.  $C^{(\tau)}$  is always symmetric. Since the dynamics are reversible, the true time-lag correlation matrix is symmetric.
2. The Rayleigh quotient:

$$\frac{\langle v | C_{\text{mle}}^{(\tau)} | v \rangle}{\langle v | \Sigma_{\text{mle}} | v \rangle}$$

is always in  $[-1, 1]$  (as long as  $\Sigma_{\text{mle}}$  is positive definite), which ensures that the eigenvalues from tICA are always real, and can be interpreted as timescales. This is because:

$$\left| \frac{1}{2M} \sum_{t=1}^M \langle v | \delta X_t \rangle \langle \delta Y_t | v \rangle + \langle v | \delta Y_t \rangle \langle \delta X_t | v \rangle \right| \leq \left| \frac{1}{2M} \sum_{t=1}^M \langle v | \delta X_t \rangle \langle \delta X_t | v \rangle + \langle v | \delta Y_t \rangle \langle \delta Y_t | v \rangle \right|$$

which follows from the Cauchy-Schwarz inequality.

## tICA Solutions are in the Span of the Input Data

The solutions to the tICA problem satisfy:

$$C^{(\tau)} |v\rangle = \lambda \Sigma |v\rangle$$

Since  $\Sigma$  is positive definite, it is also nonsingular and so we can write:

$$\begin{aligned}
|v\rangle &= \frac{1}{\lambda} \Sigma^{-1} C^{(\tau)} |v\rangle \\
&= \frac{1}{2M\lambda} \Sigma^{-1} \sum_{t=1}^M \left( \langle \Phi(X_t) | v \rangle \right) |\Phi(Y_t)\rangle + \left( \langle \Phi(Y_t) | v \rangle \right) |\Phi(X_t)\rangle \\
&:= \frac{1}{2M\lambda} \Sigma^{-1} |x\rangle
\end{aligned}$$

where we've defined  $|x\rangle$  to be the sum from the equation above. We know the covariance matrix can also be diagonalized by a unitary matrix,  $P$ :

$$\Sigma = P\Lambda P^T = \begin{bmatrix} |p_1\rangle & |p_2\rangle & \dots & |p_d\rangle \end{bmatrix} \begin{bmatrix} \lambda_1 & 0 & \dots & 0 \\ 0 & \lambda_2 & 0 & \dots \\ & & \vdots & \\ 0 & 0 & \dots & \lambda_d \end{bmatrix} \begin{bmatrix} \langle p_1 | \\ \langle p_2 | \\ \vdots \\ \langle p_d | \end{bmatrix}$$

where  $|p_i\rangle$  is an eigenvector of  $\Sigma$  and  $\lambda_i$  is its eigenvalue. It's easy to show that the eigenvectors of  $\Sigma$  are in the span of the  $|X_t\rangle$ 's and  $|Y_t\rangle$ 's. Using the decomposition above, we can rewrite the tICA solution in terms of a linear combination of the eigenvectors of  $\Sigma$ :

$$\begin{aligned}
|v\rangle &= \frac{1}{2M\lambda} P\Lambda^{-1}P^T |x\rangle \\
&= \frac{1}{2M\lambda} \begin{bmatrix} |p_1\rangle & |p_2\rangle & \dots & |p_d\rangle \end{bmatrix} \Lambda^{-1} \begin{bmatrix} \langle p_1 | x \rangle \\ \langle p_2 | x \rangle \\ \vdots \\ \langle p_d | x \rangle \end{bmatrix} \\
&= \frac{1}{2M\lambda} \sum_{i=1}^d \left( \lambda_i^{-1} \langle p_i | x \rangle \right) |p_i\rangle
\end{aligned}$$



which means that  $|v\rangle$  is in the span of the eigenvectors of  $\Sigma$ . Since the eigenvectors of  $\Sigma$  are all in the span of the data,  $|v\rangle$  is also in the span of the  $|X_t\rangle$ 's and  $|Y_t\rangle$ 's.

## Derivation of the ktICA Solution

From the main text, recall that we are trying to rewrite the numerator and denominator of the tICA objective function in Eq. (9).

$$f(|v\rangle) = \frac{\langle v | C^{(\tau)} | v \rangle}{\langle v | \Sigma | v \rangle} \quad (9)$$

As shown above, the solution  $|v\rangle$  is in the span of the input data, so let  $\beta$  be the length  $2M$  vector of coefficients such that:

$$|v\rangle = \sum_{t=1}^M \beta_i |\Phi(X_t)\rangle + \beta_{i+M} |\Phi(Y_t)\rangle \quad (10)$$

Now, we need to simply expand the numerate and denominator of Eq. (9) in terms of the elements of  $\beta$ .

$$\begin{aligned}
\langle v | C^{(\tau)} | v \rangle &= \frac{1}{2M} \sum_{t=1}^M \langle v | \Phi(X_t) \rangle \langle \Phi(Y_t) | v \rangle \\
&\quad + \langle v | \Phi(Y_t) \rangle \langle \Phi(X_t) | v \rangle \\
&= \frac{1}{2M} \sum_{t=1}^M \left( \sum_{i=1}^M \left[ \beta_i K_{it}^{XX} + \beta_{i+M} K_{it}^{YX} \right] \sum_{j=1}^M \left[ \beta_j K_{tj}^{YX} + \beta_{j+M} K_{tj}^{YY} \right] \right. \\
&\quad \left. + \sum_{i=1}^M \left[ \beta_i K_{it}^{XY} + \beta_{i+M} K_{it}^{YY} \right] \sum_{j=1}^M \left[ \beta_j K_{tj}^{XX} + \beta_{j+M} K_{tj}^{XY} \right] \right) \\
&= \frac{1}{2M} \sum_{t=1}^M \left[ \beta^T \begin{pmatrix} K^{XX} \\ K^{YX} \end{pmatrix} \right]_t \left[ \begin{pmatrix} K^{YX} & K^{YY} \end{pmatrix} \beta \right]_t \\
&\quad + \left[ \beta^T \begin{pmatrix} K^{XY} \\ K^{YY} \end{pmatrix} \right]_t \left[ \begin{pmatrix} K^{XX} & K^{XY} \end{pmatrix} \beta \right]_t \\
&= \frac{1}{2M} \beta^T \left[ \begin{pmatrix} K^{XX} \\ K^{YX} \end{pmatrix} \begin{pmatrix} K^{YX} & K^{YY} \end{pmatrix} + \begin{pmatrix} K^{XY} \\ K^{YY} \end{pmatrix} \begin{pmatrix} K^{XX} & K^{XY} \end{pmatrix} \right] \beta \\
&= \frac{1}{2M} \beta^T \begin{bmatrix} K^{XX} K^{YX} + K^{XY} K^{XX} & K^{XX} K^{YY} + K^{XY} K^{XY} \\ K^{YX} K^{YX} + K^{YY} K^{XX} & K^{YX} K^{YY} + K^{YY} K^{XY} \end{bmatrix} \beta \\
&= \frac{1}{2M} \beta^T \begin{bmatrix} K^{XX} & K^{XY} \\ K^{YX} & K^{YY} \end{bmatrix} \begin{bmatrix} K^{YX} & K^{YY} \\ K^{XX} & K^{XY} \end{bmatrix} \beta \\
&= \frac{1}{2M} \beta^T K \begin{bmatrix} 0 & I \\ I & 0 \end{bmatrix} K \beta
\end{aligned}$$

Let  $R = \begin{bmatrix} 0 & I \\ I & 0 \end{bmatrix}$ , then the numerator becomes:

$$\langle v | C^{(\tau)} | v \rangle = \frac{\beta^T K R K \beta}{2M} \quad (11)$$

Through very analogous steps, it is easy to show that the denominator becomes:

$$\langle v | \Sigma | v \rangle = \frac{\beta^T K K \beta}{2M} \quad (12)$$

This means that the tICA method can be rewritten in terms of solely inner-products and we can use the kernel trick.

## Centering Data in the Feature Space

In the proof of the ktICA solution, we assumed that the vectors,  $|\Phi(X_t)\rangle$ , were centered (i.e.  $\mathbb{E}[|\Phi(X_t)\rangle] = 0$ ). In order to solve the tICA problem, we need to calculate the gram matrix,  $K$ , between the *centered* points in  $V$ . However, it is easy to show that the centered gram matrix can be calculated from the uncentered one:

$$K = K_u - \frac{\mathbf{1}K_u}{2M} - \frac{K_u\mathbf{1}}{2M} + \frac{\mathbf{1}K_u\mathbf{1}}{4M^2} \quad (13)$$

where  $\mathbf{1}$  is a  $2M \times 2M$  matrix of all ones, and  $K_u$  is the gram matrix defined in the main text for the uncentered data.
